# Supplementary material
Source: publisher figshare collection journal article supplement (https://tandf.figshare.com/ndownloader/files/18640811)
Supplement: Supplementary file 1 [file 18640811]

## Sheet: Foglio1
relevé number		1*	2	3	4	5	6	7	8	9	10	11	12	13	14	15	16	17*	18	19	20	21	22*	23*	24	25	26	27	28	29	30*	31	32
localities		Bis	Bis	Bis	Bis	Bis	Bis	Bis	Bis	Bis	Bis	Bis	Brus	Brus	Brus	Brus	Brus	Brus	Brus	Brus	Jab	Jab	Jab	Vis	Vis	Vis	Vis	Vis	Vis	Vis	Vis	Vis	Vis
slope		30	30	20	25	20	10	30	30	20	10	20	un	un	un	un	un	un	un	un	un	un	un	80	80	80	.	.	60	15	15	30	30
aspect		S	S	W	NW	W	W	O	W	NO	O	NO	un	un	un	un	un	un	un	un	un	un	un	E	E	E	.	.	NW	E	E	NW	W
plot size		25	25	50	16	16	16	16	16	16	16	25	un	un	un	un	20	20	20	20	20	20	un	30	30	30	100	50	50	50	50	30	10
		Crithmo maritimi-Limonietum busiani											Crithmo maritmi -Limonietum brusnicensae								Crithmo-Limonietum pomense			Crithmo maritimi-Limonietum issaeae						Plantago holostei-Limonietum subanfracti
Limonium busianum Bogdanović et Brullo		2	2	2	1	2	1	1	2	2	2	1	0	0	0	0	0	0	0	0	0	0	0	0	0	0	0	0	0	0	0	0	0
Allium ampeloprasum L.		+	+	0	+	+	0	1	1	+	+	2	0	0	0	0	0	0	0	0	0	0	0	0	0	0	0	0	0	0	0	0	0
Limonium brusnicense (Trinajstić) Bogdanović et Brullo		0	0	0	0	0	0	0	0	0	0	0	2	1	1	2	2	3	2	3	0	0	0	0	0	0	0	0	0	0	0	0	0
Limonium pomoense Bogdanović et Brullo		0	0	0	0	0	0	0	0	0	0	0	0	0	0	0	0	0	0	0	3	2	1	0	0	0	0	0	0	0	0	0	0
Limonium issaeum Bogdanović et Brullo		0	0	0	0	0	0	0	0	0	0	0	0	0	0	0	0	0	0	0	0	0	0	3	3	3	3	3	2	0	0	0	0
Limonium subanfractum Trinajstić		0	0	0	0	0	0	0	0	0	0	0	0	0	0	0	0	0	0	0	0	0	0	0	0	0	0	0	0	2	3	2	3
Plantago holosteumScop.		0	0	0	0	0	0	0	0	0	0	0	0	0	0	0	0	0	0	0	0	0	0	0	0	0	0	0	0	3	2	0	2
Limonion anfracti-cancellati, Crithmo maritimi-Staticetalia, and Crithmo maritimi-Staticetea
Crithmum maritimumL.		2	2	2	2	2	2	2	2	2	2	2	3	1	1	3	3	2	3	2	2	3	3	3	2	3	3	3	3	2	3	2	2
Lotus cytisoides L.		1	1	1	1	1	+	0	1	0	1	2	2	2	3	+	1	2	2	1	+	1	0	2	1	2	1	1	0	1	1	1	1
Silene sedoides Poir.		+	+	1	+	+	+	0	1	+	+	1	0	0	0	0	+	+	0	0	0	+	0	1	1	1	+	1	+	0	+	1	+
Silene vulgaris (Moench) Garcke subsp. angustifolia Hayek		2	1	+	1	1	+	+	1	+	+	+	0	0	0	0	0	0	0	0	0	0	0	0	0	0	0	0	+	+	0	0	0
Daucus carota L. subsp. hispanicus (Gouan) Thell.		0	0	1	1	1	1	+	+	0	+	+	0	0	0	0	0	0	0	0	1	+	+	0	0	0	0	0	0	0	0	0	0
Frankenia pulverulenta L.		0	0	0	0	0	0	0	0	0	0	0	0	0	0	0	1	+	+	0	+	1	+	0	0	0	0	0	0	0	0	0	0
Other taxa
Reichardia picroides (L.) Roth		1	1	+	+	1	+	+	0	1	+	1	0	0	0	+	+	+	1	+	+	1	0	1	+	0	+	+	+	+	+	+	+
Helichrysum italicum(Roth) G. Don		+	1	1	2	1	1	0	+	+	+	1	0	0	0	0	0	0	0	0	0	0	0	0	0	0	0	0	1	1	+	0	0
Capparis orientalis Veill.		0	+	0	0	0	0	0	0	0	0	0	+	+	+	+	1	0	1	2	1	2	0	1	0	+	0	0	0	0	0	0	0
Centaurea ragusina L. subssp. ragusina		0	0	0	0	0	+	0	+	0	0	0	+	+	+	+	0	0	0	0	0	0	0	+	0	1	0	0	0	0	0	0	0
Brachypodium retusum (Pers.) P. Beauv.		+	+	0	+	+	+	0	0	0	0	+	0	0	0	0	0	0	0	0	0	0	0	0	0	0	0	0	0	0	0	0	0
Lavatera arborea L.		0	0	0	0	0	0	1	1	0	0	0	0	0	+	0	+	0	+	1	0	0	0	0	0	0	0	0	0	0	0	0	0
Schoenus nigricans L.		0	0	0	1	+	1	1	0	0	0	0	0	0	0	0	0	0	0	0	0	0	0	0	0	0	0	0	0	0	0	0	2
Dactylis glomerata L. subsp. hispanica (Roth) Nyman		+	+	0	+	+	0	0	0	0	0	0	0	0	0	0	0	0	0	0	0	0	0	0	0	0	0	0	0	0	0	0	0
Desmazeria marina (L.) Druce		+	0	0	0	0	0	0	0	0	0	+	0	0	0	0	0	0	0	0	0	0	0	0	0	0	0	0	0	0	0	+	+
Dittrichia viscosa (L.) Greuter		+	+	0	0	0	0	0	0	0	+	+	0	0	0	0	0	0	0	0	0	0	0	0	0	0	0	0	0	0	0	0	0
Orobanche minor Sm.		0	1	0	0	0	0	0	0	+	+	+	0	0	0	0	0	0	0	0	0	0	0	0	0	0	0	0	0	0	0	0	0
Parietaria judaica L.		0	0	0	0	0	0	0	0	0	0	0	+	+	+	+	0	0	0	0	0	0	0	0	0	0	0	0	0	0	0	0	0
Sedum ochroleucumChaix		+	+	0	+	+	0	0	0	0	0	0	0	0	0	0	0	0	0	0	0	0	0	0	0	0	0	0	0	0	0	0	0
Senecio leucanthemifolius Poir.		0	0	0	0	0	0	0	0	0	0	0	0	0	0	0	+	1	+	0	1	0	0	0	0	0	0	0	0	0	0	0	0
Arthrocnemum macrostachyum (Moric.) C. Koch		0	0	3	0	0	0	0	0	0	0	0	0	0	0	0	0	0	0	0	0	0	0	0	0	0	1	1	0	0	0	0	0
Atriplex prostrata Boucher ex DC. in Lam. et DC.		0	0	0	0	0	0	1	1	0	0	0	0	0	0	0	0	0	0	0	0	0	+	0	0	0	0	0	0	0	0	0	0
Inula verbascifolia (Willd.) Hausskn.		0	2	0	0	0	0	+	0	0	0	0	0	0	0	0	0	0	0	0	0	0	0	0	0	0	0	0	0	+	0	0	0
Parapholis incurva (L.) C. E. Hubb.		+	0	0	0	0	0	0	0	+	0	1	0	0	0	0	0	0	0	0	0	0	0	0	0	0	0	0	0	0	0	0	0
Sonchus asper (L.) Hill subsp. glaucescens (Jord.) Ball		+	+	0	0	0	+	0	0	0	0	0	0	0	0	0	0	0	0	0	0	0	0	0	0	0	0	0	0	0	0	0	0
Urospermum picroides (L.) Scop. ex F. W. Schmidt		+	+	0	0	0	0	0	0	+	0	0	0	0	0	0	0	0	0	0	0	0	0	0	0	0	0	0	0	0	0	0	0
Valantia muralis L.		1	+	0	0	0	0	0	0	0	0	+	0	0	0	0	0	0	0	0	0	0	0	0	0	0	0	0	0	0	0	0	0
Sporadic species		3	1	0	3	4	1	1	0	0	0	6	0	0	0	0	0	0	1	1	0	0	0	2	0	2	2	3	2	0	0	0	0
Sporadic species: Aethionema saxatile (L.) R. Br. subsp. scopulorum (Ronniger) I. A. Anderson, A. Carlström, Franzén, Karlenet H. Nybom (rel. 23: +, rel. 25: +), Arthrocnemum fruticosum (L.) Moq. (rel. 26: +, rel. 27: +), Asparagus acutifolius L. (rel. 4: +), Atriplex littoralis L. (rel. 26: +, rel. 27: 1), Centaurium erythraea Rafn (rel. 4: +), Chaenorhinum minus (L.) Lange subsp. litorale (Will…
References:
Pavletić, Z., 1973. “Flora i vegetacija Biševa s posebnim obzirom na biljnogeografski položaj otoka” [Flora and vegetation of Biševo with a special view on the plant-geographical position of the island]. Thesis, University of Zagreb, Croatia.
Pavletić, Z., 1989. “Vegetation of the class Crithmo-Limonietea in the Adriatic Littoral of Yugoslavia”. Colloques phytosociologiques, 19: 395–400.
